# Supplementary material
Source: PubMed Central journal article supplement (PMC3911071)
Supplement: AEM.03037-13_zam004145122so1.pdf [file AEM.03037-13_zam004145122so1.pdf]

**Table S1. Geographic origin of 109 strains used in this study.**

| CCBAU No.*                                                           | Geographic origin <sup>†</sup> | Reference                  |
|----------------------------------------------------------------------|--------------------------------|----------------------------|
| 03334                                                                | Linxian                        | This study                 |
| 83735, 83737, 83738, 83740, 83741, 83742, 83753                      | Aketao                         | Han <i>et al.</i> , 2009   |
| 05557, 05561                                                         | Baoding                        | Li <i>et al.</i> , 2011    |
| 23314, 23315, 23319                                                  | Bozhou                         | This study                 |
| 05583, 05590, 05603, 05606, 05593                                    | Cangxian                       | Li <i>et al.</i> , 2011    |
| 051118, 051116, 051117, 051130, 051134, 051135, 051136, 051119       | Cangxian                       | Zhang <i>et al.</i> , 2011 |
| 05617                                                                | Hejian                         | Li <i>et al.</i> , 2011    |
| 051142                                                               | Changli                        | Zhang <i>et al.</i> , 2011 |
| 05701, 05702                                                         | Changli                        | Li <i>et al.</i> , 2011    |
| 25379, 25380                                                         | Dongying                       | This study                 |
| 83656, 83658, 83660, 83665, 83666                                    | Farm150                        | Han <i>et al.</i> , 2009   |
| 83654                                                                | Farm150                        | Han <i>et al.</i> , 2009   |
| 83655                                                                | Farm150                        | Han <i>et al.</i> , 2009   |
| 83622                                                                | Farm150                        | Han <i>et al.</i> , 2009   |
| 83650                                                                | Farm150                        | Han <i>et al.</i> , 2009   |
| 03328, 03329                                                         | Fenyang                        | This study                 |
| 83635, 83639, 83640, 83641, 83644, 83646, 83643, 83647               | Fukang                         | Han <i>et al.</i> , 2009   |
| 051154, 051151, 051149                                               | Handan                         | Zhang <i>et al.</i> , 2011 |
| 45436                                                                | Hejian                         | Zhang <i>et al.</i> , 2011 |
| 05618, 05631, 05641, 05636, 05638, 05642, 05644, 05646, 05647, 05640 | Hejian                         | Li <i>et al.</i> , 2011    |
| 25394, 25395, 25396, 25422, 25409, 25426                             | Heze                           | Zhang <i>et al.</i> , 2011 |
| 23329, 23330                                                         | Huainan                        | This study                 |
| 05657, 05684, 05686, 05699                                           | Huanghua                       | Li <i>et al.</i> , 2011    |
| 45408, 45421, 45433, 45406, 45405, 45439, 45449                      | Jiaozuo                        | Zhang <i>et al.</i> , 2011 |
| 25071                                                                | Jinan                          | This study                 |
| 25429, 25441, 25471, 25438                                           | Jinan                          | Zhang <i>et al.</i> , 2011 |
| 05509                                                                | Jining                         | This study                 |
| 25489, 25589, 25509                                                  | Jining                         | Zhang <i>et al.</i> , 2011 |
| 03330, 03337                                                         | Linxian                        | This study                 |
| 83619, 83621, 83631, 83680                                           | Shihezi                        | Han <i>et al.</i> , 2009   |
| 05564                                                                | Taian                          | This study                 |
| 25564, 25619, 25583, 25566, 25572                                    | Taian                          | Zhang <i>et al.</i> , 2011 |
| 03347, 03345                                                         | Taiyuan                        | This study                 |
| 20016                                                                | Tianjin                        | Li <i>et al.</i> , 2011    |
| CCBAU107                                                             | Xinjiang                       | Han <i>et al.</i> , 2009   |

\* , The first two numbers represent the province where the strain was isolated, e.g. 03: Shanxi; 05: Hebei; 20: Tianjin; 23: Anhui; 25: Shandong; 45: Henan; 83: Xinjiang.

<sup>†</sup> , Names of cities or counties.

**Table S2. Primers used in this study and GenBank accession numbers for obtained sequences.**

| Genes           | Primer sequence (5'-3', forward/reverse)           | Tm (°C)   | GenBank Accession No. †                                                                                                                                                                                                                                                                                                                                                                                                   |
|-----------------|----------------------------------------------------|-----------|---------------------------------------------------------------------------------------------------------------------------------------------------------------------------------------------------------------------------------------------------------------------------------------------------------------------------------------------------------------------------------------------------------------------------|
| <i>bacA</i>     | CAYTACRTSTTCCGYTGG / CGTYGKCCASGARTTGAC            | 62        | KF381560 - KF381619                                                                                                                                                                                                                                                                                                                                                                                                       |
| <i>purL</i>     | TGACSGCCTAYGARATGATGC / GGRTTGCCGAAGTTCAGRIT       | 51        | KF382340 - KF382399                                                                                                                                                                                                                                                                                                                                                                                                       |
| <i>nodM</i>     | GCCTKGARTAYCGGGGMTAYGATT / AYTGCGRGWDAGCGGRATYT    | 57        | KF382220 - KF382279                                                                                                                                                                                                                                                                                                                                                                                                       |
| <i>gcvT</i>     | CGACGACCTGATGATYRCCAA / GTYTGTTTGACGAAGGGMAGG      | 51        | KF381860 - KF381919                                                                                                                                                                                                                                                                                                                                                                                                       |
| <i>cysD</i>     | CTSGAAAACGAAGCGATCCAC / CTYGGCRAARTARAGCGGYAC      | 55        | KF381680 - KF381739                                                                                                                                                                                                                                                                                                                                                                                                       |
| <i>cobO</i>     | GATGGCGAAGAAGAAGAC / ASGGRTGYTTGACSAGYT            | 54        | KF381620 - KF381679                                                                                                                                                                                                                                                                                                                                                                                                       |
| <i>nodE</i>     | GAAAGCGACSAGGAYCAGAT / GTGCCGTGMGCGTTGATRT         | 55        | KF382160 - KF382219                                                                                                                                                                                                                                                                                                                                                                                                       |
| <i>exoA</i>     | ATCCRMARCGHATCCARAGCG / CCCAGYTGATGATGGCRAGAA      | 55        | KF381740 - KF381799                                                                                                                                                                                                                                                                                                                                                                                                       |
| <i>exoY</i>     | CGGAYGGCGGMAGCRYKTTYT / CRATGACRAGRITCGGYRAKGA     | 59        | KF381800 - KF381859                                                                                                                                                                                                                                                                                                                                                                                                       |
| <i>phnC</i>     | CGCCAGTTCGGCAAGA / GGCGGTGAGDTCCTT                 | 55        | KF816087 - KF816146                                                                                                                                                                                                                                                                                                                                                                                                       |
| <i>nodC</i>     | TGATYGAYATGGARTAYTGG / GGYGACARCCARTCGCTRITG       | 55        | KF381980 - KF382039                                                                                                                                                                                                                                                                                                                                                                                                       |
| <i>nodS</i>     | AACTATCATTTATTGCACCGTGAG / TGAAAACGGGAAAGCAAGCAG   | 52        | KF382280 - KF382339                                                                                                                                                                                                                                                                                                                                                                                                       |
| <i>y4wE</i>     | TGCCGRYMSCGMATWGCTCTTC / CYCGATRCWRACGMGAAT        | 64        | KF382640 - KF382699                                                                                                                                                                                                                                                                                                                                                                                                       |
| <i>nodD1</i>    | ACGCACTGATGACCGAACGCAAAC / ATCGCCAGTCGTAACGGGAGGG  | 60        | KF382040 - KF382099                                                                                                                                                                                                                                                                                                                                                                                                       |
| <i>nodD2</i>    | GATATGTTTAAACCCAGTTCAGTCG / TGTCATGTGCAACGCTTCCT   | 55        | KF382100 - KF382159                                                                                                                                                                                                                                                                                                                                                                                                       |
| <i>rhcJ</i>     | ACACAACGAGCAGCGACACG / CCAAGAACGATGAACAAGAGGTA     | 59        | KF382400 - KF382459                                                                                                                                                                                                                                                                                                                                                                                                       |
| <i>SMc00019</i> | CADTTCCTBATHGCCATGCC / GCVGGRCANKTSAGCCADCCRTT*    | 66 to 50* | KF382460 - KF382519                                                                                                                                                                                                                                                                                                                                                                                                       |
| <i>truA</i>     | CAGGTSGCDCATSTCGAYCT / GADCGBAYCTGGTTRTGMAG*       | 58 to 48* | KF382580 - KF382639                                                                                                                                                                                                                                                                                                                                                                                                       |
| <i>thrA</i>     | GCNGBGGYATYCCSGTBATCAAG / CGYTCGATNCGRATSACYTGSGG* | 66 to 56* | KF382520 - KF382579,<br>KF815983, KF815986, KF815990,<br>KF815992, KF815997, KF816011,<br>KF816014, KF816015, KF816024,<br>KF816026, KF816027, KF816029,<br>KF816032-KF816034, KF816038,<br>KF816040-KF816042, KF816044,<br>KF816046-KF816050, KF816052,<br>KF816053, KF816056, KF816057,<br>KF816059, KF816061, KF816063,<br>KF816065, KF816067-KF816071,<br>KF816073-KF816076, KF816078,<br>KF816080-KF816084, KF816086 |

\*, Primers and PCR conditions for *SMc00019*, *truA* and *thrA* were described in Zhang *et al.* (2012).

†, 109 sequences were obtained for *thrA* and 60 sequences were obtained for each of the other 18 genes.

**Table S3. Summary of 60 representative strains used in this study .**

| CCBAU No.*                               | Genotype of Core genes | Genotype of symbiosis-related genes |       |       | Geographic origin <sup>†</sup> | Reference                  |
|------------------------------------------|------------------------|-------------------------------------|-------|-------|--------------------------------|----------------------------|
|                                          |                        | Chromosome                          | pSymB | pSymA |                                |                            |
| <i>S. fredii</i> (38 strains in total)   |                        |                                     |       |       |                                |                            |
| 83635                                    | 4                      | 1                                   | 2     | 2     | <b>Aketao</b>                  | Han <i>et al.</i> , 2009   |
| 83640, 83643                             | 4                      | 1                                   | 2     | 2     | <b>Fukang</b>                  | Han <i>et al.</i> , 2009   |
| 83735, 83753                             | 4                      | 1                                   | 7     | 2     | <b>Aketao</b>                  | Han <i>et al.</i> , 2009   |
| 03334                                    | 4                      | 1                                   | 2     | 11    | Linxian                        | This study                 |
| 83655                                    | 4                      | 1                                   | 1     | 12    | <b>Farm150</b>                 | Han <i>et al.</i> , 2009   |
| 83666                                    | 4                      | 1                                   | 1     | 12    | <b>Farm150</b>                 | Han <i>et al.</i> , 2009   |
| 20016                                    | 4                      | 2                                   | 2     | 2     | Tianjin                        | Li <i>et al.</i> , 2011    |
| 23330                                    | 5                      | 3                                   | 6     | 2     | Huainan                        | This study                 |
| 03347                                    | 5                      | 3                                   | 6     | 2     | Taiyuan                        | This study                 |
| 051118                                   | 5                      | 3                                   | 6     | 2     | Cangxian                       | Zhang <i>et al.</i> , 2011 |
| 05557, 05561                             | 5                      | 3                                   | 6     | 2     | Baoding                        | Li <i>et al.</i> , 2011    |
| 25379                                    | 5                      | 3                                   | 6     | 2     | Dongying                       | This study                 |
| 25409                                    | 5                      | 3                                   | 6     | 2     | Heze                           | Zhang <i>et al.</i> , 2011 |
| 25566                                    | 5                      | 3                                   | 6     | 2     | Taian                          | Zhang <i>et al.</i> , 2011 |
| 45436                                    | 5                      | 3                                   | 6     | 2     | Hejian                         | Zhang <i>et al.</i> , 2011 |
| 03328                                    | 3                      | 4                                   | 1     | 10    | Fenyang                        | This study                 |
| 03329                                    | 3                      | 4                                   | 1     | 9     | Fenyang                        | This study                 |
| 03330                                    | 3                      | 4                                   | 1     | 15    | Linxian                        | This study                 |
| 051154                                   | 2                      | 1                                   | 6     | 2     | Handan                         | Zhang <i>et al.</i> , 2011 |
| 45433                                    | 1                      | 1                                   | 1     | 1     | Jiaozuo                        | Zhang <i>et al.</i> , 2011 |
| 051149                                   | 1                      | 1                                   | 1     | 2     | Handan                         | Zhang <i>et al.</i> , 2011 |
| 05564                                    | 1                      | 1                                   | 1     | 2     | Taian                          | This study                 |
| 05657                                    | 1                      | 1                                   | 4     | 5     | Huanghua                       | Li <i>et al.</i> , 2011    |
| 23315                                    | 1                      | 1                                   | 3     | 2     | Bozhou                         | This study                 |
| 25380                                    | 1                      | 1                                   | 6     | 2     | Dongying                       | This study                 |
| 25422                                    | 1                      | 1                                   | 4     | 2     | Heze                           | Zhang <i>et al.</i> , 2011 |
| 25438                                    | 1                      | 1                                   | 3     | 2     | Jinan                          | Zhang <i>et al.</i> , 2011 |
| 25509                                    | 1                      | 1                                   | 3     | 3     | Jining                         | Zhang <i>et al.</i> , 2011 |
| 03337                                    | 1                      | 1                                   | 1     | 2     | Linxian                        | This study                 |
| 83619                                    | 1                      | 5                                   | 1     | 2     | <b>Shihezi</b>                 | Han <i>et al.</i> , 2009   |
| 05583                                    | 1                      | 5                                   | 1     | 2     | Cangxian                       | Li <i>et al.</i> , 2011    |
| 83622                                    | 1                      | 5                                   | 1     | 2     | <b>Farm150</b>                 | Han <i>et al.</i> , 2009   |
| 45406                                    | 6                      | 5                                   | 1     | 4     | Jiaozuo                        | Zhang <i>et al.</i> , 2011 |
| 05593                                    | 7                      | 5                                   | 1     | 2     | Cangxian                       | Li <i>et al.</i> , 2011    |
| 051142                                   | 1                      | 6                                   | 5     | 2     | Changli                        | Zhang <i>et al.</i> , 2011 |
| <i>Sinorhizobium</i> sp. II (1 strain)   |                        |                                     |       |       |                                |                            |
| 05617                                    | 8                      | 9                                   | 9     | 1     | Hejian                         | Li <i>et al.</i> , 2011    |
| <i>Sinorhizobium</i> sp. I (3 strains)   |                        |                                     |       |       |                                |                            |
| 05702                                    | 9                      | 7                                   | 8     | 8     | Changli                        | Li <i>et al.</i> , 2011    |
| 05701                                    | 10                     | 7                                   | 8     | 8     | Changli                        | Li <i>et al.</i> , 2011    |
| 25426                                    | 10                     | 7                                   | 8     | 8     | Heze                           | Zhang <i>et al.</i> , 2011 |
| <i>Sinorhizobium</i> sp. III (9 strains) |                        |                                     |       |       |                                |                            |
| 051119                                   | 11                     | 8                                   | 10    | 13    | Cangxian                       | Zhang <i>et al.</i> , 2011 |
| 051151                                   | 11                     | 8                                   | 10    | 6     | Handan                         | Zhang <i>et al.</i> , 2011 |
| 051135                                   | 11                     | 8                                   | 10    | 14    | Cangxian                       | Zhang <i>et al.</i> , 2011 |
| 051116                                   | 12                     | 8                                   | 10    | 7     | Cangxian                       | Zhang <i>et al.</i> , 2011 |
| 05590                                    |                        |                                     |       |       | Cangxian                       | Li <i>et al.</i> , 2011    |
| 051130                                   | 12                     | 8                                   | 10    | 2     | Cangxian                       | Zhang <i>et al.</i> , 2011 |
| 05618, 05631, 05641                      | 12                     | 8                                   | 10    | 13    | Hejian                         | Li <i>et al.</i> , 2011    |
| <i>Sinorhizobium sojae</i> (9 strains)   |                        |                                     |       |       |                                |                            |
| 05603, 05606                             | 13                     | 10                                  | 11    | 2     | Cangxian                       | Li <i>et al.</i> , 2011    |
| 05636, 05638, 05642, 05647               | 13                     | 10                                  | 11    | 2     | Hejian                         | Li <i>et al.</i> , 2011    |
| 05684, 05686, 05699                      | 13                     | 10                                  | 11    | 2     | Huanghua                       | Li <i>et al.</i> , 2011    |

Note: Core genes: *SMc00019*, *thrA*, *truA*; Chromosome: *bacA*, *purL*, *nodM*, *gcvT*, *cysD*, *cobO*, *nodE*; pSymB: *exoA*, *exoY*, *phnC*; pSymA: *nodC*, *nodS*, *y4wE*, *nodD1*, *nodD2*, *rhcJ*. \*. The first two numbers represent the province where the strain was isolated, e.g. 03: Shanxi; 05: Hebei; 20: Tianjin; 23: Anhui; 25: Shandong; 45: Henan; 83: Xinjiang. <sup>†</sup>, Names of cities or counties, sampling sites in bold are in Xinjiang and the other sites are in Huang-Huai-Hai region.

**Table S4. Analysis of nucleotide polymorphism for the five species based upon the combined sequences of core genes or symbiosis-related genes.**

| Species                                   | Segregating sites | h (Number of haplotypes) | Hd (Haplotype diversity) | Pi (nucleotide diversity) |
|-------------------------------------------|-------------------|--------------------------|--------------------------|---------------------------|
| <i>SMc00019-truA-thrA</i>                 |                   |                          |                          |                           |
| <i>S. fredii</i>                          | 74                | 12                       | 0.829                    | 0.01286                   |
| <i>Sinorhizobium</i> sp. I                | 32                | 3                        | 1.000                    | 0.01669                   |
| <i>Sinorhizobium</i> sp. III              | 32                | 4                        | 0.694                    | 0.01213                   |
| <i>S. sojae</i>                           | 2                 | 3                        | 0.417                    | 0.00035                   |
| <i>bacA-purL-nodM-gcvT-cysD-cobO-nodE</i> |                   |                          |                          |                           |
| <i>S. fredii</i>                          | 112               | 16                       | 0.893                    | 0.00846                   |
| <i>Sinorhizobium</i> sp. I                | 5                 | 2                        | 0.667                    | 0.00114                   |
| <i>Sinorhizobium</i> sp. III              | 38                | 4                        | 0.750                    | 0.00708                   |
| <i>S. sojae</i>                           | 7                 | 2                        | 0.222                    | 0.00053                   |
| <i>exoA-exoY-phnC</i>                     |                   |                          |                          |                           |
| <i>S. fredii</i>                          | 73                | 12                       | 0.811                    | 0.02164                   |
| <i>Sinorhizobium</i> sp. I                | 0                 | 1                        | 0.000                    | 0.00000                   |
| <i>Sinorhizobium</i> sp. III              | 7                 | 4                        | 0.583                    | 0.00143                   |
| <i>S. sojae</i>                           | 0                 | 1                        | 0.000                    | 0.00000                   |
| <i>nodC-nodS-y4wE-nodD1-nodD2-rhcJ</i>    |                   |                          |                          |                           |
| <i>S. fredii</i>                          | 23                | 10                       | 0.461                    | 0.00112                   |
| <i>Sinorhizobium</i> sp. I                | 0                 | 1                        | 0.000                    | 0.00000                   |
| <i>Sinorhizobium</i> sp. III              | 11                | 5                        | 0.806                    | 0.00183                   |
| <i>S. sojae</i>                           | 0                 | 1                        | 0.000                    | 0.00000                   |

Note: Strain number is 38 for *S. fredii*, 3 for *Sinorhizobium* sp. I, 1 for *Sinorhizobium* sp. II, 9 for *Sinorhizobium* sp. III and 9 for *S. sojae*, respectively.

**Table S5. Breakpoints detected by Recombination Detection Program (RDP).**

| Genes (bp)                                          | breakpoints (bp)                                                                           |
|-----------------------------------------------------|--------------------------------------------------------------------------------------------|
| <i>SMc00019-thrA-truA</i> (1278 bp)                 | 11-969 318-578 570-975 607-1238 689-900 738-975 751-975 751-977 973-1274 979-1249 979-1263 |
| <i>bacA-purL-nodM-gcvT-cysD-cobO-nodE</i> (2925 bp) | 3-413 318-578 461-2487 464-2545 806-1188 806-1209                                          |
| <i>exoA-exoY-phnC</i> (1088 bp)                     | 629-1088 697-1015 697-1023                                                                 |
| <i>nodC-nodS-y4wE-nodD1-nodD2-rhcJ</i> (2879 bp)    | -                                                                                          |

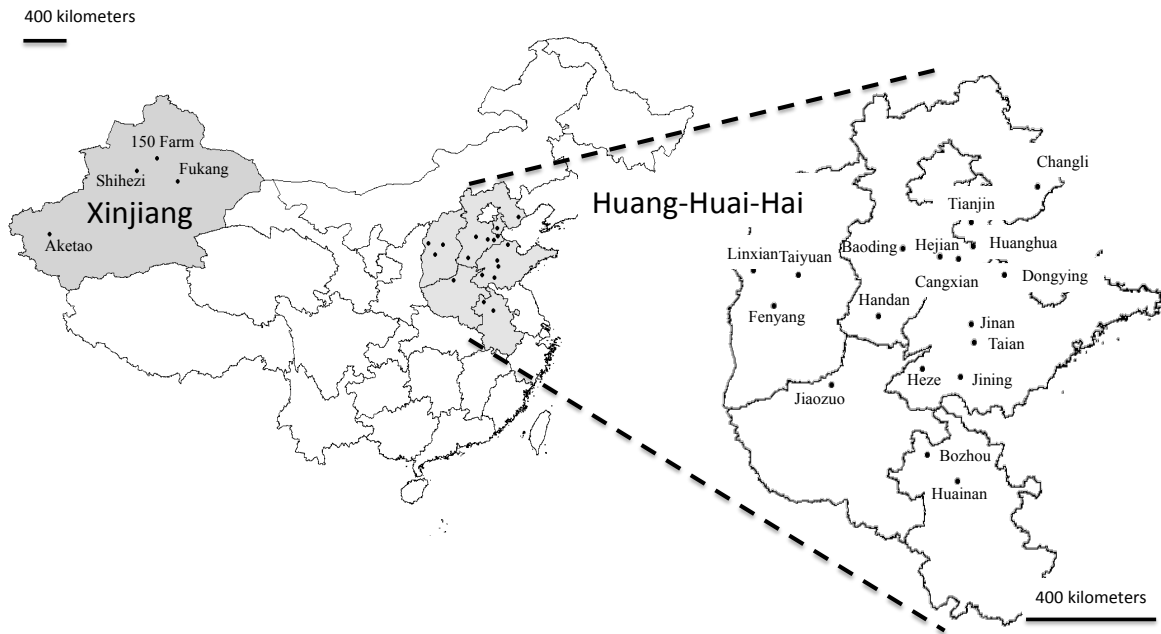

**Fig. S1 Sampling sites of soybean rhizobia used in this study** (black dots). Grey areas indicate two eco-regions (Xinjiang and Huang-Huai-Hai) where sampling sites were distributed. The two maps were created by using DIVA-GIS software ([www.diva-gis.org](http://www.diva-gis.org)) and the sampling information of soybean rhizobia firstly reported in this study and those described in earlier publications (Han et al. 2009, Li et al. 2011 and Zhang et al. 2011).

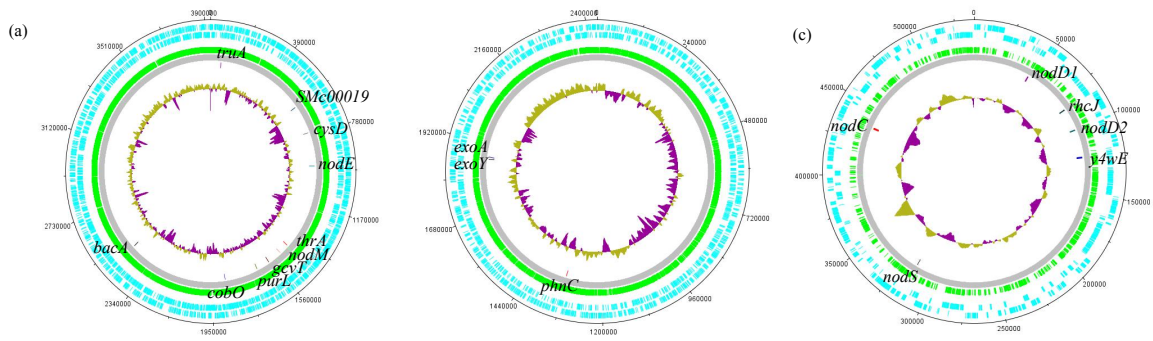

| Gene            | Complete name or Function                                               | Gene         | Complete name or Function                 |
|-----------------|-------------------------------------------------------------------------|--------------|-------------------------------------------|
| <i>truA</i>     | RNA pseudouridine synthase A                                            | <i>exoA</i>  | glucosyltransferase protein               |
| <i>thrA</i>     | homoserine dehydrogenase                                                | <i>exoY</i>  | galactosyltransferase protein             |
| <i>SMc00019</i> | conserved hypothetical protein                                          | <i>phnC</i>  | phosphonates import ATP-binding protein   |
| <i>bacA</i>     | putative transport protein, essential for bacteroid development protein | <i>y4wE</i>  | histidinol-phosphate aminotransferase     |
| <i>purL</i>     | probable phosphoribosylformyl glycinamide synthetase II protein         | <i>nodC</i>  | N-acetylglucosaminyltransferase           |
| <i>nodM</i>     | putative glucosamine synthase                                           | <i>nodS</i>  | N-methyl transferase                      |
| <i>gcvT</i>     | glycine cleavage system T protein                                       | <i>nodD1</i> | transcription regulator                   |
| <i>cysD</i>     | sulfate adenylyltransferase                                             | <i>nodD2</i> | nod box-dependent transcription activator |
| <i>cobO</i>     | cob(1)yrinic acid a,c-diamide adenylyltransferase                       | <i>rhcJ</i>  | Type III secretion component              |
| <i>nodE</i>     | beta ketoacyl ACP synthase                                              |              |                                           |

**Fig. S2. Location of the genetic markers used in this study on the genome of *Sinorhizobium* sp. NGR234.** (a): three housekeeping genes and seven symbiosis-related genes on chromosome; (b): three symbiosis-related genes on pSymB; (c): six symbiosis-related genes on pSymA.

## References

Han LL, Wang ET, Han TX, Liu J, Sui XH, Chen WF, Chen WX. 2009. Unique community structure and biogeography of soybean rhizobia in the saline-alkaline soils of Xinjiang, China. *Plant Soil* 324:291–305.

Li QQ, Wang ET, Zhang YZ, Zhang YM, Tian CF, Sui XH, Chen WF, Chen WX. 2011. Diversity and biogeography of rhizobia isolated from root nodules of *Glycine max* grown in Hebei province, China. *Microb. Ecol.* 61:917–931.

Zhang YM, Li Jr. Y, Chen WF, Wang ET, Tian CF, Li QQ, Sui XH, Chen WX. 2011. Biodiversity and biogeography of rhizobia associated with soybean plants grown in the North China Plain. *Appl. Environ. Microbiol.* 77:6331–6342.

Zhang YM, Tian CF, Sui XH, Chen WF, Chen WX. 2012. Robust Markers Reflecting Phylogeny and Taxonomy of Rhizobia. *PLoS One.* 7, e44936.
